# Supplementary material for: Low Frequency Dielectric Relaxation and Conductance of Solid Polymer Electrolytes with PEO and Blends of PEO and PMMA
Source: PubMed Central journal article supplement (PMC7284942; doi:10.3390/polym12051009), 2020-04-27
Supplement: polymers-12-01009-s001.pdf [file polymers-12-01009-s001.pdf]

## Supplementary file

# Low Frequency Dielectric Relaxation and Conductance of Solid Polymer Electrolytes with PEO and Blends of PEO and PMMA

Chin Han Chan \* and Hans-Werner Kammer

Faculty of Applied Sciences, University Teknologi MARA, 40500 Shah Alam, Malaysia; hans-werner.kammer@jsk-medianet.de

\* Correspondence: cchan\_25@yahoo.com.sg

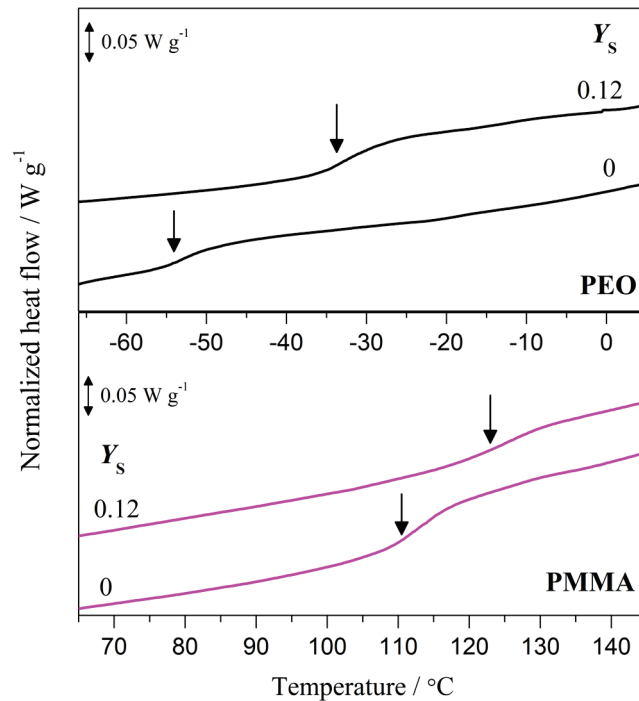

**Figure S1.** DSC scans for the two parent polymers versus added salt content  $Y_s$ . Arrows show the glass transition temperatures

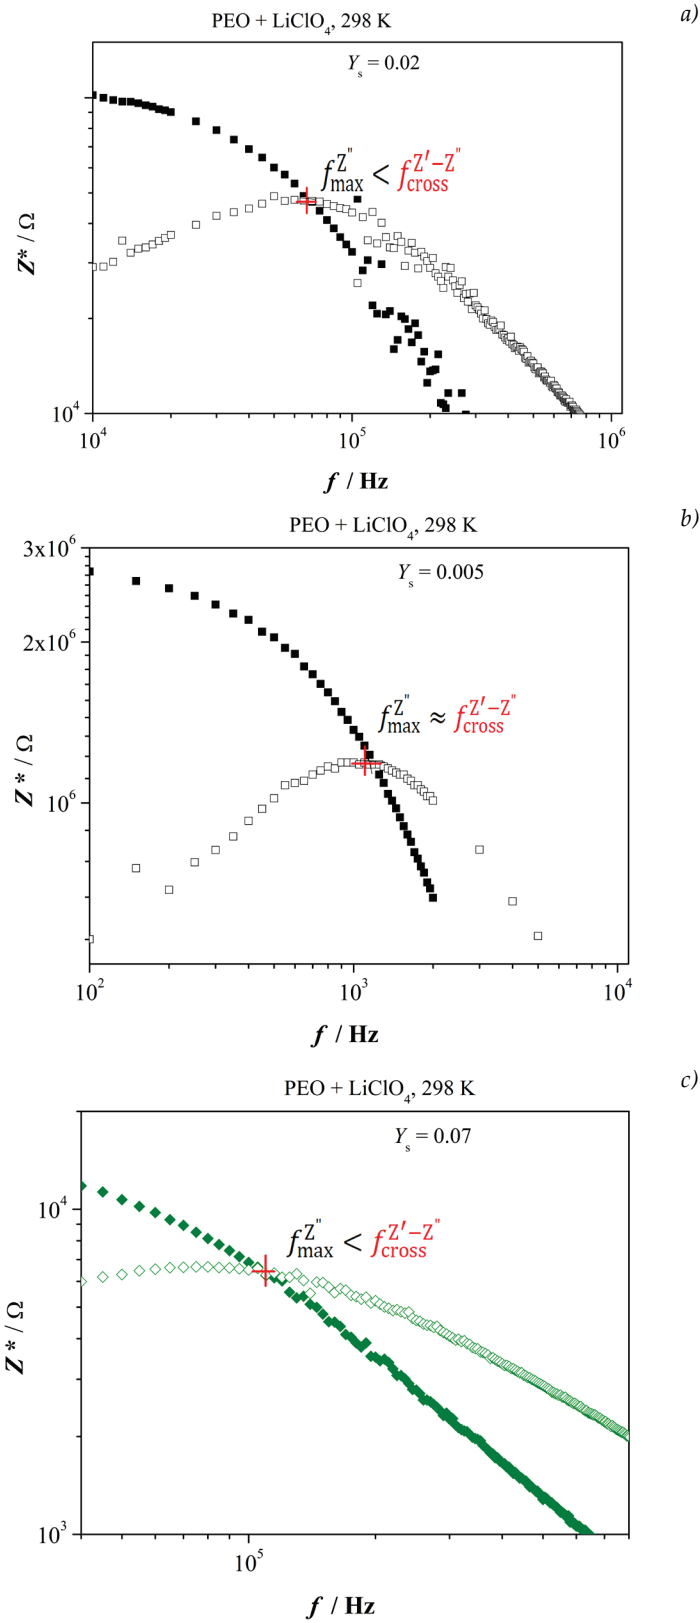

**Figure S2.** Impedance spectra of PEO with indicated salt concentration;  $Z''$  – open marker

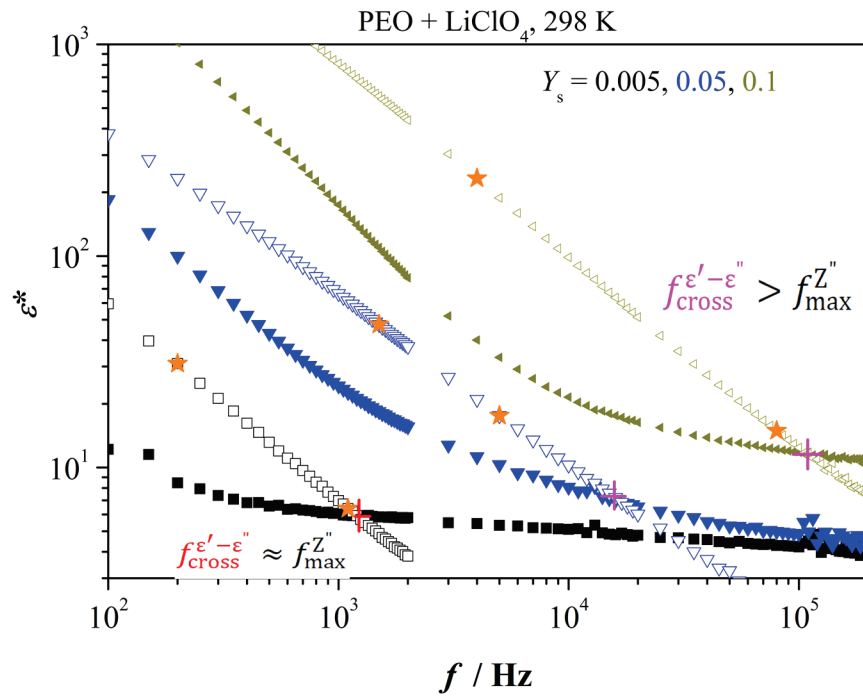

**Figure S3.** Selected permittivity spectra for the indicated salt concentration;  $\varepsilon'$  – solid marker; stars mark the low-frequency range  $f_{\min}^{Z''} \dots f_{\max}^{Z''}$
